# Supplementary material for: Multiple-Molecule Drug Design Based on Systems Biology Approaches and Deep Neural Network to Mitigate Human Skin Aging
Source: MDPI journal article supplement (doi:10.3390/molecules26113178), 2021-05-26
Supplement: s1 [file s1]

## Supplementary Materials.

### 1.1 Dynamic systems modeling for the candidate GWGEN

For the candidate miRNA regulation network in the candidate GWGEN, the  $r$ th miRNA can be described by a stochastic dynamic equation as below:

$$\begin{aligned} m_r(t+1) = & m_r(t) + \sum_{i=1}^{I_r} a_{ri}^M p_i(t) - \sum_{n=1}^{R_r} b_{rn}^M m_r(t) m_n(t) + \sum_{\ell=1}^{L_r} c_{r\ell}^M o_\ell(t) \\ & - \mu_r^M m_r(t) + \delta_r^M + \omega_r^M(t), \\ & \text{for } r = 1, 2, \dots, R, \quad b_{rn}^M \leq 0 \text{ and } -\mu_r^M \leq 0 \end{aligned} \quad (s1)$$

where  $R$  is the total number of miRNA in candidate GWGEN;  $m_r(t)$ ,  $p_i(t)$ , and  $o_\ell(t)$  represent the expression level of the  $r$ th miRNA, the  $i$ th TF, and the  $\ell$ th lncRNA, respectively;  $a_{ri}^M$ ,  $-b_{rn}^M$ , and  $c_{r\ell}^M$  signify the regulatory abilities of the  $i$ th TF regulation, the  $n$ th miRNA repression, and the  $\ell$ th lncRNA regulation, respectively;  $-\mu_r^M$  and  $\delta_r^M$  denote the degradation rate and basal level of the  $r$ th miRNA, respectively;  $\omega_r^M(t)$  represents the stochastic noise of the  $r$ th miRNA at time  $t$ . Note that the biological regulatory mechanisms in equation (s1) involve TF transcription regulations by  $\sum_{i=1}^{I_r} a_{ri}^M p_i(t)$ , miRNA repressions by  $-\sum_{n=1}^{R_r} b_{rn}^M m_r(t) m_n(t)$ , lncRNA regulations by  $\sum_{\ell=1}^{L_r} c_{r\ell}^M o_\ell(t)$ , the miRNA degradation by  $-\mu_r^M m_r(t)$ , the basal level by  $\delta_r^M$ , and the stochastic noise by  $\omega_r^M(t)$ .

For the candidate lncRNA regulation network in the candidate GWGEN, the  $z$ th lncRNA can be described in a stochastic dynamic equation as below:

$$\begin{aligned} o_z(t+1) = & o_z(t) + \sum_{i=1}^{I_z} a_{zi}^L p_i(t) - \sum_{r=1}^{R_z} b_{zr}^L o_z(t) m_r(t) + \sum_{x=1}^{L_z} c_{zx}^L o_x(t) \\ & - \mu_z^L o_z(t) + \delta_z^L + \omega_z^L(t), \\ & \text{for } z = 1, 2, \dots, Z, \quad -b_{zr}^L \leq 0 \text{ and } -\mu_z^L \leq 0 \end{aligned} \quad (s2)$$

where  $Z$  is the total number of lncRNA in candidate GWGEN;  $o_z(t)$ ,  $p_i(t)$ ,  $m_r(t)$ , and  $\omega_z^L(t)$

represent the expression level of the  $z$ th lncRNA, the  $i$ th TF, the  $r$ th miRNA, and stochastic noise at time  $t$ , respectively;  $a_{zi}^L$ ,  $-b_{zx}^L$ , and  $c_{zx}^L$  signify the regulatory abilities of the  $i$ th TF regulation, the  $r$ th miRNA repression, and the  $x$ th lncRNA regulation, respectively;  $-\mu_z^L$  and  $\delta_z^L$  denote the degradation rate and basal level of the  $z$ th lncRNA, respectively. Note that the biological regulatory mechanisms in equation (s2) involve TF transcription regulations by  $\sum_{i=1}^{I_z} a_{zi}^L p_i(t)$ , miRNA repressions by  $-\sum_{n=1}^{R_z} b_{zn}^L o_z(t) m_n(t)$ , lncRNA regulations by  $\sum_{x=1}^{L_z} c_{zx}^L o_x(t)$ , the lncRNA degradation by  $-\mu_z^L m_z(t)$ , the basal level by  $\delta_z^L$ , and the stochastic noise by  $\omega_z^L(t)$ .

## 1.2 Systems identification approach in the candidate GWGEN via microarray data

The dynamic equation for miRNA in equation (s1) can be rewrite in the following liner regression form:

$$\begin{aligned}
 m_r(t+1) = & [ \quad p_1(t) \cdots p_{I_r}(t) \quad m_r(t) m_1(t) \cdots m_r(t) m_{R_r}(t) \\
 & o_1(t) \cdots o_{L_r}(t) \quad m_r(t) \quad 1 ] \begin{bmatrix} a_{r1}^M \\ \vdots \\ a_{rI_r}^M \\ -b_{r1}^M \\ \vdots \\ -b_{rR_r}^M \\ c_{r1}^M \\ \vdots \\ c_{rL_r}^M \\ 1 - \mu_r^M \\ \delta_r^M \end{bmatrix} + \omega_r^M(t), \\
 = & \psi_r^M(t) \theta_r^M + w_r^M(t), \quad \text{for } r = 1, 2, \dots, R
 \end{aligned} \tag{s3}$$

where  $\psi_r^M(t)$  represents the regression vector that can be obtained from the microarray data and  $\theta_r^M$  signifies the unknown parameter vector to be estimated for the  $r$ th miRNA in the miRNA regulation network. By observing the equation (s3), the  $r$ th miRNA for  $Y_r$  time points can be rewritten as the following form:

$$\begin{bmatrix} m_r(t_2) \\ m_r(t_3) \\ \vdots \\ m_r(t_{Y_r}+1) \end{bmatrix} = \begin{bmatrix} \psi_r^M(t_1) \\ \psi_r^M(t_2) \\ \vdots \\ \psi_r^M(t_{Y_r}) \end{bmatrix} \theta_r^M + \begin{bmatrix} \omega_r^M(t_1) \\ \omega_r^M(t_2) \\ \vdots \\ \omega_r^M(t_{Y_r}) \end{bmatrix}, \quad \text{for } r=1,2,\dots,R \quad (\text{s4})$$

Next, we simplify the equation (s4) in the form shown below:

$$M_r = \Psi_r^M \theta_r^M + \Omega_r^M, \quad \text{for } r=1,2,\dots,R \quad (\text{s5})$$

where

$$M_r = \begin{bmatrix} m_r(t_2) \\ m_r(t_3) \\ \vdots \\ m_r(t_{Y_r}+1) \end{bmatrix}, \quad \Psi_r^M = \begin{bmatrix} \psi_r^M(t_1) \\ \psi_r^M(t_2) \\ \vdots \\ \psi_r^M(t_{Y_r}) \end{bmatrix}, \quad \Omega_r^M = \begin{bmatrix} \omega_r^M(t_1) \\ \omega_r^M(t_2) \\ \vdots \\ \omega_r^M(t_{Y_r}) \end{bmatrix}.$$

Therefore, the regulatory parameters in the vector  $\theta_r^M$  can be estimated by solving the following constrained least-squares estimation problem:

$$\hat{\theta}_r^M = \min_{\theta_r^M} \frac{1}{2} \|\Psi_r^M \theta_r^M - M_r\|_2^2, \quad \text{subject to} \quad A^M \theta_r^M \leq b^M \quad (\text{s6})$$

where

$$A^R = \begin{bmatrix} 0 & 0 & \cdots & 0 & 1 & 0 & \cdots & 0 & 0 & 0 & \cdots & 0 & 0 & 0 \\ 0 & 0 & \cdots & 0 & 0 & 1 & \cdots & 0 & 0 & 0 & \cdots & 0 & 0 & 0 \\ \vdots & \vdots & \ddots & \vdots & \vdots & \vdots & \ddots & \vdots & \vdots & \vdots & \ddots & \vdots & \vdots & \vdots \\ 0 & 0 & \cdots & 0 & 0 & 0 & \cdots & 1 & 0 & 0 & \cdots & 0 & 0 & 0 \\ 0 & 0 & \cdots & 0 & 0 & 0 & \cdots & 0 & 0 & 0 & \cdots & 0 & 1 & 0 \end{bmatrix} \in \mathbb{R}^{(R_r+1) \times (I_r+R_r+L_r+2)}$$

$$, \quad b^M = \begin{bmatrix} 0 \\ \vdots \\ 1 \end{bmatrix}.$$

By applying the function *lsqlin* in MATLAB optimization toolbox to solve the parameter estimation problem in equation (s6), we can estimate the regulatory parameters in equation (s1). Furthermore, we

ensure that the miRNA repression ability  $-b_m^M$  to be a non-positive value and the miRNA degradation rate  $-\mu_r^M$  to be a non-positive value for  $r = 1, 2, \dots, R$  and  $n = 1, 2, \dots, R_r$ .

Similarly, the  $z$ th lncRNA dynamic regulation in equation (s2) can be written in the following linear regression form:

$$\begin{aligned}
 o_z(t+1) = & [p_1(t) \cdots p_{l_z}(t) \quad o_z(t)m_1(t) \cdots o_z(t)m_{R_z}(t) \\
 & \quad \quad \quad \begin{bmatrix} a_{z_1}^L \\ \vdots \\ a_{z_{l_z}}^L \\ -b_{z_1}^L \\ \vdots \\ -b_{z_{R_z}}^L \\ c_{z_1}^L \\ \vdots \\ c_{z_{l_z}}^L \\ 1 - \mu_z^L \\ \delta_z^L \end{bmatrix} + \omega_z^L(t), \\
 & = \psi_z^L(t)\theta_z^L + w_z^L(t), \quad \text{for } z = 1, 2, \dots, Z
 \end{aligned} \tag{s7}$$

where  $\psi_z^L(t)$  represents the regression vector that can be obtained from the microarray data and  $\theta_z^L$  signifies the unknown parameter vector to be estimated for the  $z$ th lncRNA in equation (s2). By observing the equation (s7), the  $z$ th lncRNA for  $Y_z$  time points can be rewritten as

$$\begin{bmatrix} o_z(t_2) \\ o_z(t_3) \\ \vdots \\ o_z(t_{Y_z} + 1) \end{bmatrix} = \begin{bmatrix} \psi_z^L(t_1) \\ \psi_z^L(t_2) \\ \vdots \\ \psi_z^L(t_{Y_z}) \end{bmatrix} \theta_z^L + \begin{bmatrix} \omega_z^L(t_1) \\ \omega_z^L(t_2) \\ \vdots \\ \omega_z^L(t_{Y_z}) \end{bmatrix}, \quad \text{for } z = 1, 2, \dots, Z \tag{s8}$$

Afterwards, we simplify the equation (s8) as below:

$$O_z = \Psi_z^L \theta_z^L + \Omega_z^L, \quad \text{for } z = 1, 2, \dots, Z \tag{s9}$$

where

$$O_z = \begin{bmatrix} o_z(t_2) \\ o_z(t_3) \\ \vdots \\ o_z(t_{Y_z} + 1) \end{bmatrix}, \quad \Psi_z^L = \begin{bmatrix} \psi_z^L(t_1) \\ \psi_z^L(t_2) \\ \vdots \\ \psi_z^L(t_{Y_z}) \end{bmatrix}, \quad \Omega_z^L = \begin{bmatrix} \omega_z^L(t_1) \\ \omega_z^L(t_2) \\ \vdots \\ \omega_z^L(t_{Y_z}) \end{bmatrix}.$$

Hence, the regulatory parameters in the vector  $\theta_z^L$  can be estimated by solving the following constrained least-squares estimation problem:

$$\hat{\theta}_z^L = \min_{\theta_z^L} \frac{1}{2} \|\Psi_z^L \theta_z^L - O_z\|_2^2, \quad \text{subject to} \quad A^L \theta_z^L \leq b^L \quad (\text{s10})$$

where

$$A^L = \begin{bmatrix} 0 & 0 & \cdots & 0 & 1 & 0 & \cdots & 0 & 0 & 0 & \cdots & 0 & 0 & 0 \\ 0 & 0 & \cdots & 0 & 0 & 1 & \cdots & 0 & 0 & 0 & \cdots & 0 & 0 & 0 \\ \vdots & \vdots & \ddots & \vdots & \vdots & \vdots & \ddots & \vdots & \vdots & \vdots & \ddots & \vdots & \vdots & \vdots \\ 0 & 0 & \cdots & 0 & 0 & 0 & \cdots & 1 & 0 & 0 & \cdots & 0 & 0 & 0 \\ 0 & 0 & \cdots & 0 & 0 & 0 & \cdots & 0 & 0 & 0 & \cdots & 0 & 1 & 0 \end{bmatrix} \in \mathbb{R}^{(R_z+1) \times (I_z+R_z+L_z+2)}$$

$$, \quad b^L = \begin{bmatrix} 0 \\ \vdots \\ 1 \end{bmatrix}.$$

Applying the function *lsqlin* in MATLAB optimization toolbox to solve the parameter estimation problem in equation (s10), we can estimate the regulatory parameters in equation (s2). Furthermore, we ensure that the miRNA repression ability  $-b_{zr}^L$  to be a non-positive value and the lncRNA degradation rate  $-\mu_z^L$  to be a non-positive value for  $r = 1, 2, \dots, R_z$ .

### 1.3 Pruning false-positives in candidate GWGENs to obtain real GWGENs by system order detection scheme

For the miRNA model in equation (s5), AIC value of the  $r$ th miRNA can be defined in the following equation:

$$AIC_r^M(I_r, R_r, L_r) = \log \left\{ \frac{1}{T_r} \left[ M_r - \Psi_r^M \hat{\theta}_r^M \right]^T \left[ M_r - \Psi_r^M \hat{\theta}_r^M \right] \right\} + \frac{2(I_r + R_r + L_r)}{T_r} \quad (s11)$$

where  $\hat{\theta}_r^M$  denotes the estimated interactive parameters of the  $r$ th miRNA from the solutions of the parameter estimation problem in equation (s6), and the covariance of estimated residual

error is  $(\varsigma_r^M)^2 = \frac{1}{T_r} \left[ M_r - \Psi_r^M \hat{\theta}_r^M \right]^T \left[ M_r - \Psi_r^M \hat{\theta}_r^M \right]$ . In order to find out the real system

order  $I_r^*$ ,  $R_r^*$ , and  $O_r^*$  of the real regulations of the  $r$ th miRNA in GRN, we have to minimize

$AIC_r^M(I_r^*, R_r^*, L_r^*)$  in equation (s11). By the system order detection scheme, miRNAs with

insignificant repression abilities, which are out of  $I_r^*$ ,  $R_r^*$ , and  $O_r^*$  can be regarded as false-positives and pruned away from the candidate miRNA GRN of the  $r$ th miRNA.

For the lncRNA model in equation (s9), AIC value of the  $z$ th lncRNA can be defined as below:

$$AIC_z^L(I_z, R_z, L_z) = \log \left\{ \frac{1}{T_z} \left[ O_z - \Psi_z^L \hat{\theta}_z^L \right]^T \left[ O_z - \Psi_z^L \hat{\theta}_z^L \right] \right\} + \frac{2(I_z + R_z + L_z)}{T_z} \quad (s12)$$

where  $\hat{\theta}_z^L$  denotes the estimated interactive parameters of the  $z$ th lncRNA from the solutions of the parameter estimation problem in equation (s10), and the covariance of estimated residual error is

$(\varsigma_z^L)^2 = \frac{1}{T_z} \left[ O_z - \Psi_z^L \hat{\theta}_z^L \right]^T \left[ O_z - \Psi_z^L \hat{\theta}_z^L \right]$ . In order to find out the real system order  $I_z^*$ ,  $R_z^*$ , and

$O_z^*$  of the  $z$ th lncRNA, we minimize  $AIC_z^L(I_z, R_z, L_z)$  in equation (s12). By the system order

detection scheme, lncRNAs with insignificant interaction abilities, which are out of  $I_z^*$ ,  $R_z^*$ , and  $O_z^*$ , can be treated as false-positives and pruned away from the candidate lncRNA GRN of the  $z$ th lncRNA.

## Tables

**Table S1.** The pathway enrichment analysis of proteins through applying the DAVID in the core GWGEN of young-stage skin.

| Term                   | Numbers | p-value  |
|------------------------|---------|----------|
| Pathways in cancer     | 91      | 4.33E-04 |
| HTLV-I infection       | 62      | 1.06E-03 |
| MAPK signaling pathway | 61      | 1.60E-03 |
| Viral carcinogenesis   | 60      | 5.42E-06 |
| Endocytosis            | 60      | 7.70E-04 |

**Table S2.** The pathway enrichment analysis of proteins through applying the DAVID in the core GWGEN of middle-stage skin.

| Term                       | Numbers | p-value  |
|----------------------------|---------|----------|
| Pathways in cancer         | 99      | 6.64E-06 |
| PI3K-Akt signaling pathway | 72      | 2.34E-02 |
| Viral carcinogenesis       | 67      | 1.40E-08 |
| HTLV-1 infection           | 65      | 1.99E-04 |
| Alcoholism                 | 52      | 2.26E-05 |

**Table S3.** The pathway enrichment analysis of proteins through applying the DAVID in the core GWGEN of elder-stage skin

| Term                       | Numbers | p-value  |
|----------------------------|---------|----------|
| Pathways in cancer         | 107     | 1.40E-07 |
| PI3K-Akt signaling pathway | 75      | 1.36E-02 |
| Viral carcinogenesis       | 67      | 3.53E-08 |
| Alcoholism                 | 61      | 1.81E-08 |
| MAPK signaling pathway     | 59      | 7.01E-03 |

**Table S4.** Drug targets with their corresponding small-molecule compounds

| AIFM1 (-)    |                        |             | CAT (-)    |                        |             |
|--------------|------------------------|-------------|------------|------------------------|-------------|
| Drug         | Perturbation Signature | Sensitivity | Drug       | Perturbation Signature | Sensitivity |
| ranitidine   | 0.003                  | 0.129       | niridazole | 0.064                  | 0.052       |
| niridazole   | 0.02                   | 0.052       | decitabine | 0.072                  | -1.186      |
| liothyronine | 0.042                  | -0.006      |            |                        |             |
| IGF1R (+)    |                        |             | LMNA (-)   |                        |             |
| Drug         | Perturbation Signature | Sensitivity | Drug       | Perturbation Signature | Sensitivity |
| pinacidil    | -0.061                 | -0.103      | niridazole | 0.052                  | 0.052       |
| allantoin    | -0.075                 | -0.053      |            |                        |             |

+ abnormal upregulation

-abnormal downregulation

**Table S5.** Drug targets with their corresponding small-molecule compounds

| MMP9 (+)     |                        |             | IL6 (-)      |                        |             |
|--------------|------------------------|-------------|--------------|------------------------|-------------|
| Drug         | Perturbation Signature | Sensitivity | Drug         | Perturbation Signature | Sensitivity |
| allantoin    | -0.137                 | -0.053      | allantoin    | 0.016                  | -0.053      |
| diclofenac   | -0.086                 | -0.232      |              |                        |             |
| mepyramine   | -0.021                 | -0.037      |              |                        |             |
| BCL2 (+)     |                        |             | CASP3 (+)    |                        |             |
| Drug         | Perturbation Signature | Sensitivity | Drug         | Perturbation Signature | Sensitivity |
| resveratrol  | -0.685                 | -0.305      | resveratrol  | -0.771                 | -0.305      |
| mepyramine   | -0.043                 | -0.037      | azathioprine | -0.393                 | -1.053      |
| azathioprine | -0.347                 | -1.053      |              |                        |             |

+ abnormal upregulation  
-abnormal downregulation

**Figures**

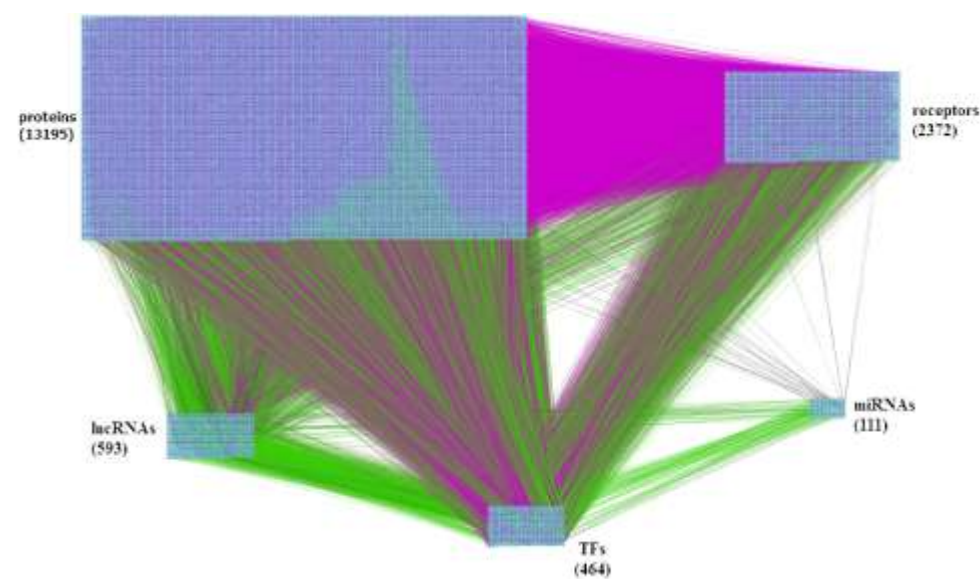

**Figure S1.** The real genome-wide genetic and epigenetic network (GWGEN) of young-stage skin. The purple lines denote protein-protein interactions (PPIs); The green lines indicate transcriptional regulations by TFs and lncRNAs; The black lines represent post-transcriptional regulations by miNRAs; The numbers of Receptors, Proteins, lncRNAs, TFs and miRNAs are 2372, 14941, 593, 464 and 111, respectively.



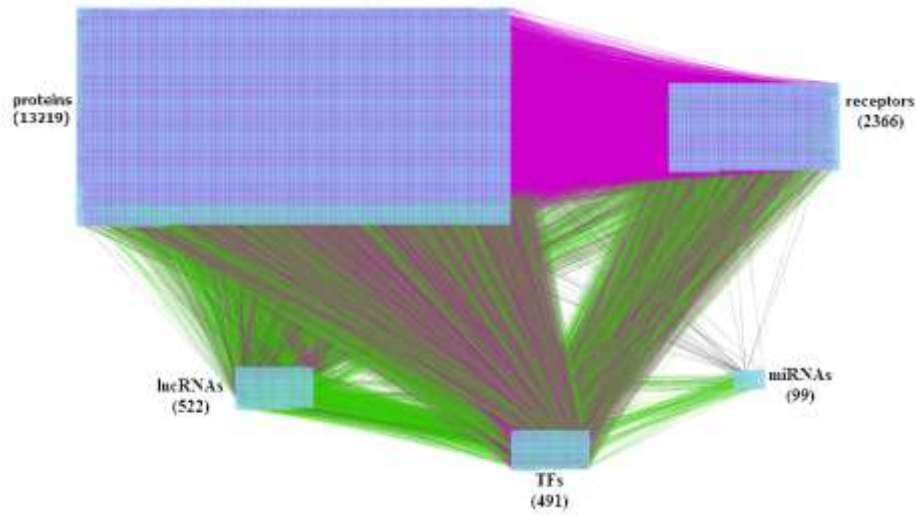

**Figure S2.** The real genome-wide genetic and epigenetic network (GWGEN) of middle-stage skin. The purple lines denote protein-protein interactions (PPIs); The green lines indicate transcriptional regulations by TFs and lncRNAs; The black lines represent post-transcriptional regulations by miRNAs; The numbers of Receptors, Proteins, lncRNAs, TFs and miRNAs are 2366, 14910, 522, 491 and 99, respectively.

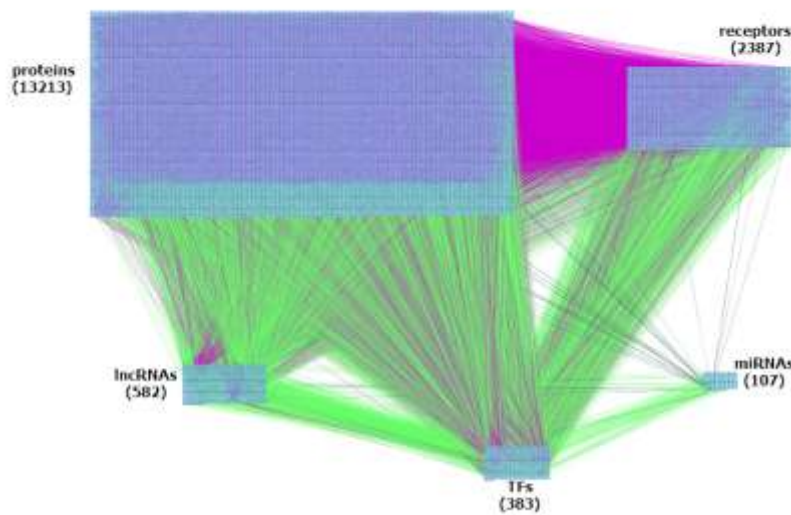

**Figure S3.** The real genome-wide genetic and epigenetic network (GWGEN) of elder-stage skin. The purple lines denote protein-protein interactions (PPIs); The green lines indicate transcriptional regulations by TFs and lncRNAs; The black lines represent post-transcriptional regulations by miRNAs; The numbers of Receptors, Proteins, lncRNAs, TFs and miRNAs are 2387, 13213, 582, 383 and 107, respectively.

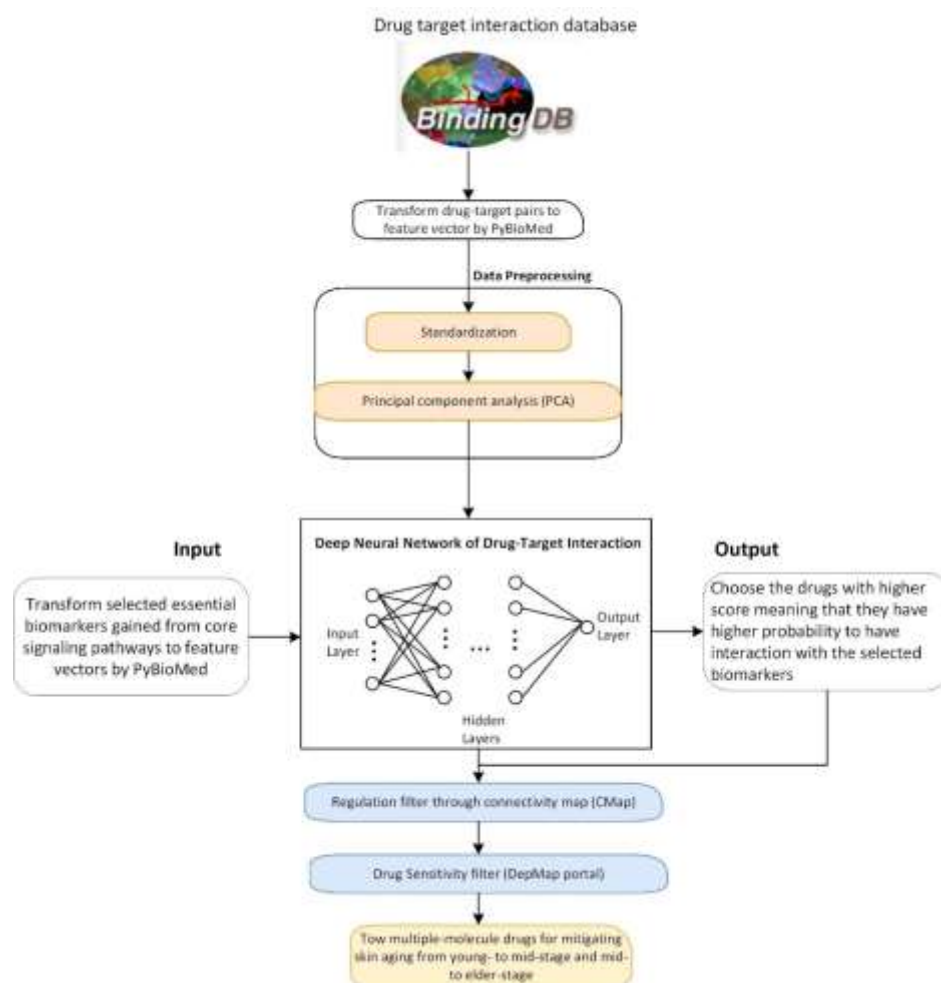

**Figure S4.** Deep neural network of drug-target interaction framework.
